# Supplementary material
Source: PubMed Central journal article supplement (PMC1326238)
Supplement: nar_34_1_66__1.pdf [file nar_34_1_66__1.pdf]

**Table S1** – Name abbreviations, cassette configurations and loci for all bacterial species and genes analyzed in this work.

| Code | Microorganism                                    | Phylogenetic Class   | Genome status (Database) | Genes (locus) <sup>a</sup>                                                                                                                                                                                                                                                             |
|------|--------------------------------------------------|----------------------|--------------------------|----------------------------------------------------------------------------------------------------------------------------------------------------------------------------------------------------------------------------------------------------------------------------------------|
| Aca  | <i>Acidobacterium capsulatum</i> ATCC 51196      | Acidobacteria        | Unfinished (JGI)         | <i>dnaE1</i> (contig:83(4042146-4045646))<br>[1] <i>imuA-imuB-dnaE2*</i> (contig:83(3697911-3703675))<br>[2] <i>imuA-imuB-dnaE2*</i> (contig:83(1798056-1800681))                                                                                                                      |
| Ade  | <i>Anaeromyxobacter dehalogenans</i> 2CP-C       | Delta Proteobacteria | Unfinished (JGI)         | <i>dnaE1</i> (adeh_Contig57_or0691)<br><i>imuA-imuB-dnaE2*</i> (adeh_Contig78_or1753_or1754_or1755)                                                                                                                                                                                    |
| Afe  | <i>Acidithiobacillus ferrooxidans</i> ATCC 23270 | Gamma Proteobacteria | Unfinished (TIGR)        | <i>lexA</i> (contig:10428(1183578-1182973))<br><i>dnaE1</i> (contig:10428(1538883-1535695))<br><i>imuA-imuB-dnaE2*</i> (contig:10428(1180782-1183938))                                                                                                                                 |
| Acn  | <i>Actinomyces naeslundii</i> MG1                | Actinobacteria       | Unfinished (TIGR)        | <i>dnaE1</i> (contig:1063(1165855-1162328))<br><i>dnaE2</i> (contig:1063(677485-680893))                                                                                                                                                                                               |
| Atu  | <i>Agrobacterium tumefaciens</i> C58             | Alpha Proteobacteria | Finished (TIGR)          | <i>lexA</i> (AGR_C_2577)<br><i>dnaE1</i> (AGR_C_2379)<br>[1] <i>imuA-imuB-dnaE2<sup>EXP</sup></i> (AGR_L_3170;AGR_L_3171;AGR_L_3173)<br>[2] <i>imuA-imuB-dnaE*</i> [P](AGR_pT1_172; AGR_pT1_174; AGR_pT1_175)<br>[3] <i>imuA-imuB-dnaE*</i> [P](AGR_pAT_143; AGR_pAT_144; AGR_pAT_bx5) |
| Avi  | <i>Azotobacter vinelandii</i> AvOP               | Gamma Proteobacteria | Unfinished (JGI)         | <i>lexA-sulA</i> (avin_Contig60_or7543; or7544)                                                                                                                                                                                                                                        |
| Azo  | <i>Azoarcus</i> sp. EbN1                         | Beta Proteobacteria  | Finished (NCBI)          | <i>dnaE1</i> (ebA4398)<br><i>lexA-imuA-imuB-dnaE2*</i> (ebA3086; ebA3084; ebA3079; ebA3077)                                                                                                                                                                                            |
| Bba  | <i>Bdellovibrio bacteriovorus</i> HD100          | Delta Proteobacteria | Finished (TIGR)          | <i>dnaE1</i> (Bd2078)<br><i>lexA-imuA-imuB-dnaE2<sup>EXP</sup></i> (Bd0386; Bd0385; Bd0384)                                                                                                                                                                                            |
| Bbr  | <i>Bordetella bronchiseptica</i> RB50            | Beta Proteobacteria  | Finished (NCBI)          | <i>lexA</i> (BB2271)<br><i>dnaE1</i> (BB3401)<br><i>imuA-imuB-dnaE2*</i> (BB3086; BB3087; BB3088)                                                                                                                                                                                      |
| Bfu  | <i>Burkholderia fungorum</i> LB400               | Beta Proteobacteria  | Unfinished (JGI)         | <i>lexA</i> (Bcep02001088)<br><i>dnaE1</i> (Bcep02004347)                                                                                                                                                                                                                              |
| Bja  | <i>Bradyrhizobium japonicum</i> USDA 110         | Alpha Proteobacteria | Finished (NCBI)          | <i>imuA-imuB-dnaE2</i> (Bcep03_11(284253-283371); Bcep02005997; Bcep02005996)<br><i>dnaE1</i> (bjk4866)<br><i>imuA-imuB-dnaE2*</i> (bjr3024; bjr3025; bjr3026)                                                                                                                         |
| Bli  | <i>Brevibacterium linens</i> BL2                 | Actinobacteria       | Unfinished (JGI)         | <i>dnaE1</i> (BlinB01002773)<br><i>imuA-imuB-dnaE2*</i> (BlinB01000045; BlinB01000044; BlinB01000043)                                                                                                                                                                                  |
| Bma  | <i>Burkholderia mallei</i> ATCC 23344            | Beta Proteobacteria  | Finished (NCBI)          | <i>lexA</i> (BMA1211)<br><i>dnaE1</i> (BMA1913)<br><i>imuA-imuB-dnaE2*</i> (BMA3143; BMA3144; BMA3145)                                                                                                                                                                                 |
| Bme  | <i>Brucella melitensis</i> 16M                   | Alpha Proteobacteria | Finished (NCBI)          | <i>dnaE1</i> (BMEI1137)<br><i>imuA-imuB-dnaE2*</i> (BMEI1874; BMEI1875; BMEI1876)                                                                                                                                                                                                      |
| Bpa  | <i>Bordetella parapertussis</i> 12822            | Beta Proteobacteria  | Finished (NCBI)          | <i>imuA-imuB-dnaE2*</i> (BPP1642; BPP1641; BPP1640)                                                                                                                                                                                                                                    |
| Bth  | <i>Burkholderia thailandensis</i> E264           | Beta Proteobacteria  | Unfinished (NCBI)        | <i>lexA</i> (BTH_12481)<br><i>dnaE1</i> (BTH_10984)<br><i>imuA-imuB-dnaE2*</i> (BTH_10443; BTH_10444; BTH_10445)                                                                                                                                                                       |

**Table S1 Microorganism abbreviations (cont.)**

| Code | Microorganism                                                      | Phylogenetic Class   | Genome status (Database) | Genes (locus) <sup>a</sup>                                                                                                                                                                                                                                                                                          |
|------|--------------------------------------------------------------------|----------------------|--------------------------|---------------------------------------------------------------------------------------------------------------------------------------------------------------------------------------------------------------------------------------------------------------------------------------------------------------------|
| Bvi  | <i>Burkholderia vietnamiensis</i> strain G4 (R1808)                | Beta Proteobacteria  | Unfinished (JGI)         | <i>lexA</i> (bcep_1808_contig153_or1754)<br><i>dnaE1</i> (bcep_1808_contig181_or4508)<br>[1] <i>imuA-imuB-dnaE2*</i> (bcep_1808_contig169_or3127_or3126_or3125)<br>[2] <i>imuA-imuB-dnaE2*</i> (bcep_1808_contig189_or6053_or6054_or6056)<br>[3] <i>imuA-imuB-dnaE2*</i> (bcep_1808_contig190_or6286_or6284_or6283) |
| Ccr  | <i>Caulobacter crescentus</i> CB15                                 | Alpha Proteobacteria | Finished (TIGR)          | <i>dnaE1</i> (CC1926)<br><i>imuA-imuB-dnaE2*</i> (CC3213; CC3212; CC3211)                                                                                                                                                                                                                                           |
| Cdi  | <i>Corynebacterium diptheriae</i> NCTC 13129                       | Actinobacteria       | Finished (NCBI)          | <i>dnaE1</i> (DIP1580)<br><i>imuA-imuB* // dnaE2*</i> (DIP0603; DIP0604; DIP0612)                                                                                                                                                                                                                                   |
| Cef  | <i>Corynebacterium efficiens</i> YS-314                            | Actinobacteria       | Finished (NCBI)          | <i>dnaE1</i> (CE2029)<br><i>imuA-imuB* // dnaE2*</i> (CE0627; CE0628; CE0632)                                                                                                                                                                                                                                       |
| Dar  | <i>Dechloromonas aromatica</i> RCB                                 | Beta Proteobacteria  | Finished (NCBI)          | <i>dnaE1</i> (Dar03003504)<br><i>lexA-imuA-imuB-dnaE2*</i> (Dar03000438; Dar03000439; Dar03000440; Dar03000441)                                                                                                                                                                                                     |
| Eca  | <i>Erwinia carotovora</i> subsp. <i>atroseptica</i> SCR11043       | Gamma Proteobacteria | Finished (NCBI)          | <i>lexA</i> (ECA0630)<br><i>suIA</i> (ECA1752)                                                                                                                                                                                                                                                                      |
| Hdu  | <i>Haemophilus ducreyi</i> 35000HP                                 | Gamma Proteobacteria | Finished (NCBI)          | <i>lexA</i> (HD0545)                                                                                                                                                                                                                                                                                                |
| Hin  | <i>Haemophilus influenzae</i> Rd KW20                              | Gamma Proteobacteria | Finished (NCBI)          | <i>lexA</i> (HI0749)                                                                                                                                                                                                                                                                                                |
| Hne  | <i>Hyphomonas neptunium</i> ATCC 15444                             | Alpha Proteobacteria | Unfinished (TIGR)        | <i>dnaE1</i> (contig:1064(1808598-1811798))<br><i>imuA-imuB-dnaE2*</i> (contig:1064(2586708-2592563))                                                                                                                                                                                                               |
| Ilo  | <i>Iliomarina loliensis</i> L2TR                                   | Gamma Proteobacteria | Finished (NCBI)          | <i>lexA-sulA</i> (ILO262; ILO261)<br><i>dnaE1</i> (IL1689)<br><i>imuA-imuB-dnaE2*</i> (IL2568; IL2567; IL2566)                                                                                                                                                                                                      |
| Jan  | <i>Jannaschia</i> sp. CCS1                                         | Alpha Proteobacteria | Unfinished (JGI)         | <i>dnaE1</i> (jann_contig27_or3832)<br><i>imuA-imuB-dnaE2*</i> (jann_contig21_or1135_or0974_or0973)                                                                                                                                                                                                                 |
| Kra  | <i>Kineococcus radiotolerans</i> SRS30216                          | Actinobacteria       | Unfinished (NCBI)        | <i>dnaE1</i> (KradDRAFT_1996)<br><i>dnaE2</i> (KradDRAFT_4570)                                                                                                                                                                                                                                                      |
| Mav  | <i>Mycobacterium avium</i> subsp. <i>paratuberculosis</i> str. K10 | Actinobacteria       | Finished (NCBI)          | <i>dnaE1</i> (MAP1257)<br><i>imuA-imuB* // dnaE2*</i> (MAP3488c; MAP3487c; MAP3476c)                                                                                                                                                                                                                                |
| Mbo  | <i>Mycobacterium bovis</i> AF2122197                               | Actinobacteria       | Finished (NCBI)          | <i>dnaE1</i> (Mb1574)<br><i>imuA-imuB // dnaE2</i> (Mb3427c; Mb3426c; Mb3405c)                                                                                                                                                                                                                                      |
| Mca  | <i>Methylococcus capsulatus</i> str. Bath                          | Gamma Proteobacteria | Finished (NCBI)          | <i>dnaE1</i> (MCA1286)                                                                                                                                                                                                                                                                                              |
| Mde  | <i>Microbulbifer degradans</i> 2-40                                | Gamma Proteobacteria | Finished (JGI)           | <i>lexA-imuA-imuB-dnaE2*</i> (MCA2167; MCA2166; MCA2165; MCA2164)<br><i>dnaE1</i> (Mdeg02002690; Mdeg02002691)<br><i>dnaE1</i> (Mdeg02003964)                                                                                                                                                                       |
| Mlo  | <i>Mesorhizobium loti</i> MAF303099                                | Alpha Proteobacteria | Finished (NCBI)          | <i>imuA-imuB-dnaE2*</i> (Mdeg02003698; Mdeg02003699; Mdeg02003700)<br><i>dnaE1</i> (ml0870)<br><i>imuA-imuB-dnaE2*</i> (mlr4426; mlr4427; mlr4428)                                                                                                                                                                  |
| Msm  | <i>Mycobacterium smegmatis</i> str. MC2 155                        | Actinobacteria       | Finished (TIGR)          | <i>dnaE1</i> (MSMEG3185)<br><i>imuA-imuB* // dnaE2*</i> (MSMEG1619; MSMEG1620; MSMEG1631)                                                                                                                                                                                                                           |
| Msu  | <i>Mannheimia succiniciproducens</i> MBEL55E                       | Gamma Proteobacteria | Finished (JGI)           | <i>lexA</i> (MS0744)                                                                                                                                                                                                                                                                                                |

**Table S1** Microorganism abbreviations (cont.)

| Code | Microorganism                                      | Phylogenetic Class   | Genome status (Database) | Genes (locus) <sup>a</sup>                                                                                                                        |
|------|----------------------------------------------------|----------------------|--------------------------|---------------------------------------------------------------------------------------------------------------------------------------------------|
| Mlu  | <i>Mycobacterium tuberculosis</i> H37Rv            | Actinobacteria       | Finished (NCBI)          | <i>dnaE1</i> (Rv1547)<br><i>imuA-imuB</i> <sup>EXP</sup> // <i>dnaE</i> <sup>EXP</sup> (Rv3395c; Rv3394c; Rv3370c)                                |
| Mxa  | <i>Mycococcus xanthus</i> DK 1622                  | Delta Proteobacteria | Finished (TIGR)          | <i>dnaE1</i> (MXAN5844)<br><i>dnaE2</i> (MXAN3982)                                                                                                |
| Nar  | <i>Novosphingobium aromaticivorans</i> DSM 12444   | Alpha Proteobacteria | Unfinished (JGI)         | <i>dnaE1</i> (Saro02001581)<br><i>imuB-dnaE2</i> (Saro02001815; Saro02001814)                                                                     |
| Nfa  | <i>Nocardia farcinica</i> IFM 10152                | Actinobacteria       | Finished (NCBI)          | <i>dnaE1</i> (nfa18000)<br><i>imuA-imuB</i> * // <i>dnaE2</i> * (nfa9050; nfa9060; nfa9150)                                                       |
| Nha  | <i>Nitrobacter hamburgensis</i>                    | Alpha Proteobacteria | Unfinished (JGI)         | <i>dnaE1</i> (nham_Contig31_or3119)<br><i>imuA-imuB-dnaE2</i> * (nham_Contig32_or4111; or4112; or4113)                                            |
| Noc  | <i>Nocardioides</i> sp. JS614                      | Actinobacteria       | Unfinished (JGI)         | <i>imuA-imuB-dnaE2</i> * (NocaDRAFT_0716-0715-0714)                                                                                               |
| Nwi  | <i>Nitrobacter winogradskyi</i> Nb-255             | Alpha Proteobacteria | Unfinished (JGI)         | <i>dnaE1</i> (Nwi1860)<br><i>imuA-imuB-dnaE2</i> * (Nwi2257; Nwi2256; Nwi2255)                                                                    |
| Pac  | <i>Propionibacterium acnes</i> KPA171202           | Actinobacteria       | Finished (NCBI)          | <i>dnaE1</i> (PPA1150)<br><i>imuA-imuB-dnaE2</i> (PPA1652; PPA1651; PPA1650)                                                                      |
| Pae  | <i>Pseudomonas aeruginosa</i> PA01                 | Gamma Proteobacteria | Finished (NCBI)          | <i>lexA-sulA</i> (PA3007; PA3008)<br><i>dnaE1</i> (PA3640)<br><i>imuA-imuB-dnaE2</i> <sup>EXP</sup> (PA0671; PA0670; PA0669)                      |
| Pde  | <i>Paracoccus denitrificans</i> 1222               | Alpha Proteobacteria | Unfinished (JGI)         | <i>dnaE1</i> (pden_Contig65_or3675)<br><i>imuA-imuB-dnaE2</i> * (pden_Contig47_or0508; or0509; or0510)                                            |
| Pfi  | <i>Pseudomonas fluorescens</i> PfO-1               | Gamma Proteobacteria | Finished (NCBI)          | <i>lexA-sulA</i> (Pfi3872; Pfi3873)<br><i>dnaE1</i> (Pflu02000786)                                                                                |
| Plu  | <i>Photobacterium luminescens laumondii</i> TTO1   | Gamma Proteobacteria | Finished (NCBI)          | <i>lexA-imuA-imuB-dnaE2</i> * (Pflu02001451; Pflu02001450; Pflu02001449)<br><i>lexA</i> (plu4374)<br><i>sulA</i> (plu1776)                        |
| Pmu  | <i>Pasteurella multocida</i> Pm70                  | Gamma Proteobacteria | Finished (NCBI)          | <i>lexA</i> (PM1181)                                                                                                                              |
| Pol  | <i>Polaromonas</i> sp. JS666                       | Beta Proteobacteria  | Unfinished (JGI)         | <i>lexA</i> (PJS6w01000717)<br><i>dnaE1</i> (PJS6w01000655)<br><i>imuA-imuB-dnaE2</i> * (PJS6w01001324; PJS6w01001323; PJS6w01001322)             |
| Ppu  | <i>Pseudomonas putida</i> KT2440                   | Gamma Proteobacteria | Finished (NCBI)          | <i>lexA-sulA</i> (PP2143; PP2142)<br><i>dnaE1</i> (PP1606)<br><i>lexA-imuA-imuB-dnaE2</i> <sup>EXP</sup> (PP3116; PP3117; PP3118; PP3119)         |
| Psy  | <i>Pseudomonas syringae</i> pv. tomato str. DC3000 | Gamma Proteobacteria | Finished (NCBI)          | <i>lexA-sulA</i> (PSPTO3510; PSPTO3511)<br><i>dnaE1</i> (PSPTO1549)<br><i>lexA-imuA-imuB-dnaE2</i> * (PSPTO2792; PSPTO2793; PSPTO2794; PSPTO2795) |
| Rba  | <i>Rhodospirillum rubrum</i> sp. SH 1              | Planctomycetacia     | Finished (NCBI)          | <i>dnaE1</i> (RB3103)<br><i>imuA-imuB</i> // <i>dnaE2</i> (RB11894; RB11891; RB1262)                                                              |
| Reu  | <i>Ralstonia eutropha</i> JMP134                   | Beta Proteobacteria  | Finished (NCBI)          | <i>lexA</i> (Raeuf03005043)<br><i>dnaE1</i> (Raeuf03003398)<br><i>imuA-imuB-dnaE2</i> * (Raeuf03000580; Raeuf03000579; Raeuf03000578)             |

**Table S1** Microorganism abbreviations (cont.)

| Code | Microorganism                                      | Phylogenetic Class   | Genome status (Database) | Genes (locus) <sup>a</sup>                                                                                                                                                     |
|------|----------------------------------------------------|----------------------|--------------------------|--------------------------------------------------------------------------------------------------------------------------------------------------------------------------------|
| Rfe  | <i>Rhodoferrax ferritducens</i> DSM 15236          | Beta Proteobacteria  | Unfinished (JGI)         | <i>lexA</i> (rfer_Contig120_or0680)<br><i>dnaE1</i> (rfer_Contig128_or1225)<br><i>imuA-imuB-dnaE2*</i> (rfer_Contig129_or1329; or1330; or1331)                                 |
| Rge  | <i>Rubrivivax gelatinosus</i> PM1                  | Beta Proteobacteria  | Unfinished (JGI)         | <i>lexA</i> (Rgel02000775)<br><i>dnaE1</i> (Rgel02000390)                                                                                                                      |
| Rpa  | <i>Rhodopseudomonas palustris</i> CGA009           | Alpha Proteobacteria | Finished (NCBI)          | [1] <i>imuA-imuB-dnaE*</i> (Rgel02001694; Rgel02001693; Rgel02001692)<br>[2] <i>imuA-imuB-dnaE*</i> (Rgel02004204; Rgel02004205; Rgel02004206)                                 |
| Rso  | <i>Ralstonia solanacearum</i> GMI1000              | Beta Proteobacteria  | Finished (NCBI)          | <i>dnaE1</i> (RPA2924)<br><i>imuA-imuB-dnaE2*</i> (RPA1801; RPA1802; RPA1803)                                                                                                  |
| Rsp  | <i>Rhodobacter sphaeroides</i> 2.4.1               | Alpha Proteobacteria | Unfinished (JGI)         | <i>lexA</i> (RS02826)                                                                                                                                                          |
| Rxy  | <i>Rubrobacter xylanophilus</i> DSM9941            | Actinobacteria       | Unfinished (JGI)         | <i>dnaE1</i> (RSc2205)<br><i>imuA-imuB-dnaE2*</i> [P] (RSp0798; RSp0799; RSp0800)                                                                                              |
| Sal  | <i>Sphingopyxis alaskensis</i> RB2256              | Alpha Proteobacteria | Unfinished (JGI)         | <i>dnaE2*</i> (Rsp3001842)<br><i>dnaE1</i> (Rxy02001647)<br><i>dnaE2</i> (Rxy02001858)                                                                                         |
| Sam  | <i>Shewanella amazonensis</i> SB2B                 | Gamma Proteobacteria | Unfinished (JGI)         | <i>dnaE1</i> (sala_Contig53_or1622)<br><i>imuA-imuB-dnaE2*</i> (sala_Contig54(55834-56634); sala_Contig54_or1789; or1790)                                                      |
| Sav  | <i>Streptomyces avermitilis</i> MA4680             | Actinobacteria       | Finished (NCBI)          | <i>dnaE1</i> (sama_Contig94_or2941)<br><i>imuA-imuB-dnaE2*</i> (sama_Contig89_or2565; or2564; or2563)                                                                          |
| Sco  | <i>Streptomyces coelicolor</i> A3(2)               | Actinobacteria       | Finished (NCBI)          | <i>dnaE1</i> (SAV6143)<br><i>dnaE2-imuB*</i> (SAV6556; SAV6555)                                                                                                                |
| She  | <i>Shewanella</i> sp. PV 4                         | Gamma Proteobacteria | Unfinished (JGI)         | <i>dnaE1</i> (SCO2064)<br><i>dnaE2-imuB*</i> (SCO1738; SCO1739)                                                                                                                |
| Sil  | <i>Silicibacter</i> sp. TM1040                     | Alpha Proteobacteria | Unfinished (JGI)         | <i>lexA-sulA</i> (shew_Contig149_or1969; or1970)<br><i>dnaE1</i> (shew_Contig136_or1059)<br><i>imuA-imuB-dnaE2*</i> (shew_Contig147_or1815; or1814; or1813)                    |
| Sme  | <i>Sinorhizobium meliloti</i> 1021                 | Alpha Proteobacteria | Finished (NCBI)          | <i>dnaE1</i> (rose_tm1040_Contig54_or2345)<br><i>imuA-imuB-dnaE2</i> (rose_tm1040_Contig54_or2641or2642_or2643)                                                                |
| Spo  | <i>Silicibacter pomeroyi</i> DSS-3                 | Alpha Proteobacteria | Finished (NCBI)          | <i>dnaE1</i> (SMc01375)<br>[1] <i>imuA-imuB-dnaE<sup>EXP</sup></i> (SMc03790; SMc03789; SMc03788)<br>[2] <i>imuA2-imuB2-dnaE<sup>EXP</sup></i> [P] (SMa0888; SMa0890; SMa0892) |
| Sth  | <i>Symbiobacterium thermophilum</i> IAM 14863      | Actinobacteria       | Finished                 | <i>dnaE1</i> (SPO0656)<br><i>imuA-imuB-dnaE2*</i> (SPO0672; SPO0671; SPO0670)                                                                                                  |
| Sth  | <i>Symbiobacterium thermophilum</i> IAM 14863      | Actinobacteria       | Finished                 | <i>dnaE1</i> (STH659)<br><i>dnaE2</i> (STH1885)                                                                                                                                |
| Stm  | <i>Salmonella enterica</i> serovar Typhimurium LT2 | Gamma Proteobacteria | Finished (NCBI)          | <i>lexA</i> (STM4237)<br><i>sulA</i> (STM1071)                                                                                                                                 |

**Table S1** Microorganism abbreviations (cont.)

| Code | Microorganism                                                 | Phylogenetic Class   | Genome status (Database) | Genes (locus) <sup>a</sup>                                                                                                                                                             |
|------|---------------------------------------------------------------|----------------------|--------------------------|----------------------------------------------------------------------------------------------------------------------------------------------------------------------------------------|
| Sus  | <i>Solibacter usitatus</i> sp. Ellin6076                      | Acidobacteria        | Unfinished (JGI)         | <i>dnaE1</i> (acid_Contig153_or1903)<br><i>imuA-imuB-dnaE2*</i> (acid_Contig197_or7377; or7376; or7375)                                                                                |
| Tde  | <i>Thiobacillus denitrificans</i> ATCC 25259                  | Beta Proteobacteria  | Finished (NCBI)          | <i>lexA</i> (TdenA01000303)<br><i>dnaE1</i> (TdenA01001960)                                                                                                                            |
| Tro  | <i>Thermomicrobium roseum</i> DSM 5159                        | Thermomicrobia       | Unfinished (TIGR)        | <i>imuA-imuB-dnaE2*</i> (TdenA01001988; TdenA01001989; TdenA01001990)<br><i>dnaE1</i> (TIGR-contig:2179(1745177-1748371))<br><i>imuA-imuB-dnaE2*</i> (TIGR-contig:2179(903553-898367)) |
| Vch  | <i>Vibrio cholerae</i> strain N16961                          | Gamma Proteobacteria | Finished (NCBI)          | <i>lexA</i> (VP2945)                                                                                                                                                                   |
| Vpa  | <i>Vibrio parahaemolyticus</i> RIMD 2210633                   | Gamma Proteobacteria | Finished (NCBI)          | <i>dnaE1</i> (VP2303)                                                                                                                                                                  |
| Vsp  | <i>Verrucomicrobium spinosum</i> DSM 4136                     | Verrucomicrobiae     | Unfinished (TIGR)        | <i>imuA-imuB-dnaE2*</i> (VP2034; VP2035; VP2036)<br><i>dnaE1</i> (TIGR-contig:534(5031804-5028598))                                                                                    |
| Vvu  | <i>Vibrio vulnificus</i> CMCP6                                | Gamma Proteobacteria | Finished (NCBI)          | <i>lexA-imuA-imuB-dnaE2*</i> (TIGR-contig:526(5563779-5568872))<br><i>lexA</i> (VV11166)<br><i>dnaE1</i> (VV11875)                                                                     |
| Wme  | <i>Wautersia metallidurans</i> CH34                           | Beta Proteobacteria  | Unfinished (NCBI)        | <i>imuA-imuB-dnaE2*</i> (VV12987; VV12988; VV12989)<br><i>lexA</i> (RmetDRAFT_4464)                                                                                                    |
| Xax  | <i>Xanthomonas axonopodis</i> pv. <i>citri</i> str. 306       | Gamma Proteobacteria | Finished (NCBI)          | <i>dnaE1</i> (RmetDRAFT_3458)<br><i>imuA-imuB-dnaE2*</i> (RmetDRAFT_5017; RmetDRAFT_5018)<br><i>lexA-recA-recX</i> (XAC1739; XAC1740; XAC1741)<br><i>dnaE1</i> (XAC1406)               |
| Xca  | <i>Xanthomonas campestris</i> pv. <i>campestris</i> ATCC33913 | Gamma Proteobacteria | Finished (NCBI)          | <i>lexA-imuA-imuB-dnaE2*</i> (XAC1196; XAC1197; XAC1198; XAC1199)<br><i>lexA-recA-recX</i> (XCC1721; XCC1722; XCC1723)<br><i>dnaE1</i> (XCC1358)                                       |
| Xfa  | <i>Xylella fastidiosa</i> CVC 8.1.b clone 9.a.5.c             | Gamma Proteobacteria | Finished (NCBI)          | <i>lexA-imuA-imuB-dnaE2<sup>EXP</sup></i> (XCC1098; XCC1099; XCC1100; XCC1101)                                                                                                         |
| Xor  | <i>Xanthomonas oryzae</i> pv. <i>oryzae</i> KACC10331         | Gamma Proteobacteria | Finished (NCBI)          | <i>lexA-recA-recX</i> (XOO2942; XOO2941; XOO2942)<br><i>dnaE1</i> (XOO1962)                                                                                                            |
| Ype  | <i>Yersinia pestis</i> KIM                                    | Gamma Proteobacteria | Finished (NCBI)          | <i>lexA-imuA-imuB-dnaE2*</i> (XOO3442; XOO3441; XOO3440; XOO3439)<br><i>lexA</i> (YPTB0370)<br><i>suJA</i> (YPTB1454)                                                                  |

<sup>a</sup> Numbers between square brackets denote different cassette instances in the same bacterial species. When available, each gene locus is shown between parentheses. For some unfinished genomes, the genes were located using BLASTX searches and, in this case, the contig number and its location relative to contig start are shown between parentheses.

[P] following a cassette instance indicates that it is encoded in a plasmid.

\* indicates that LexA-binding motifs have been identified *in silico* in the promoter region of the first cassette gene

<sup>EXP</sup> stands for experimentally verified LexA-binding motifs in cassette instances.
